# Supplementary material
Source: PubMed Central journal article supplement (PMC10439260)
Supplement: sextrans-2022-055601supp002.pdf [file sextrans-2022-055601supp002.pdf]

**Supplementary material 2.** A more detailed overview of clinical, behavioural and epidemiological information of interview participants.

| # | Time between symptom onset and clinical diagnosis | Clinical manifestation                                                   | Epidemiological link (direct/indirect) *                                                                 | Close physical contact (incl. household; no sex) -21 days before symptom onset | Sexual contact -21 days before symptom onset |                  |                                               |                                                                                |                                          | Relevant contact since date of symptom onset |                                                              |                                                                                                                       |
|---|---------------------------------------------------|--------------------------------------------------------------------------|----------------------------------------------------------------------------------------------------------|--------------------------------------------------------------------------------|----------------------------------------------|------------------|-----------------------------------------------|--------------------------------------------------------------------------------|------------------------------------------|----------------------------------------------|--------------------------------------------------------------|-----------------------------------------------------------------------------------------------------------------------|
|   |                                                   |                                                                          |                                                                                                          |                                                                                | Type of partner**                            | Setting          | Type of sex                                   | Exposure site                                                                  | MPX suspect ***                          | Type of contact                              | MPX suspect ***                                              |                                                                                                                       |
| 1 | 8 days                                            | Two days of fever, followed by peri-anal lesions without other symptoms. | No known contact with a confirmed positive case.<br><br>Attended Darklands festival in Antwerp (Belgium) | Regular contact with stable partner as part of the same household.             | 1                                            | Stable (n=1)     | Private sphere (Belgium)                      | 1) Anal ("bottom and top")<br>2) Oro-penile (active and passive)<br>3) Kissing | Penis, ano-rectum,, oropharynx and lips. | No                                           | Regular close physical contact with stable partner (no sex). | Stable partner developed symptoms of MPX 8 days after symptoms onset of index case and later tested positive for MPX. |
|   |                                                   |                                                                          |                                                                                                          |                                                                                | 2                                            | Anonymous (n=10) | Gay sauna with dark room in Lisbon (Portugal) | 1) Anal ("bottom and top")<br>2) Oro-penile (active and passive)<br>3) Kissing | Penis, ano-rectum, oropharynx and lips.  | No                                           |                                                              |                                                                                                                       |
|   |                                                   |                                                                          |                                                                                                          |                                                                                | 3                                            | Anonymous (n=10) | Darklands Festival in Antwerp (Belgium)       | 1) Anal ("bottom and top")<br>2) Oro-penile (active and passive)<br>3) Kissing | Penis, ano-rectum, oropharynx and lips.  | No                                           |                                                              |                                                                                                                       |
| 2 | 15 days                                           | General symptoms of fever and malaise, followed by skin lesions on       | No known contact with a confirmed positive case.                                                         | Regular contact with stable partner as part of the same household.             | 1                                            | Stable (n=1)     | Private sphere (Belgium)                      | 1) Anal ("bottom")<br>2) Oro-penile (active and passive)<br>3) Kissing         | Penis, ano-rectum, oropharynx, lips.     | No                                           | Regular physical contact with stable partner (no sex)        | No                                                                                                                    |

| # | Time between symptom onset and clinical diagnosis | Clinical manifestation                                                            | Epidemiological link (direct/indirect) *                                                                                                    | Close physical contact (incl. household; no sex) -21 days before symptom onset | Sexual contact -21 days before symptom onset |                  |                                        |                                                                                |                                                             | Relevant contact since date of symptom onset |                                                                                           |    |
|---|---------------------------------------------------|-----------------------------------------------------------------------------------|---------------------------------------------------------------------------------------------------------------------------------------------|--------------------------------------------------------------------------------|----------------------------------------------|------------------|----------------------------------------|--------------------------------------------------------------------------------|-------------------------------------------------------------|----------------------------------------------|-------------------------------------------------------------------------------------------|----|
|   |                                                   |                                                                                   |                                                                                                                                             |                                                                                | Type of partner**                            | Setting          | Type of sex                            | Exposure site                                                                  | MPX suspect ***                                             | Type of contact                              | MPX suspect ***                                                                           |    |
|   |                                                   | cheek, arm and little finger. No ano-genital lesions.                             | Sexual contact with a man that attended Darklands festival in Antwerp (indirect)                                                            |                                                                                | 2                                            | Anonymous (n=1)  | Private sphere (Grindr date) (Belgium) | 1) Anal ("bottom and top")<br>2) Oro-penile (active and passive)<br>3) Kissing | Penis, ano-rectum, oropharynx, lips, cheek, neck and torso. | Yes                                          |                                                                                           |    |
|   |                                                   |                                                                                   |                                                                                                                                             |                                                                                | 3                                            | Anonymous (n=10) | Gay sauna with dark room (Belgium)     | 1) Anal ("bottom and top")<br>2) Oro-penile (active and passive)<br>3) Kissing | Penis, ano-rectum, oropharynx, lips, cheek, neck and torso. | No                                           |                                                                                           |    |
| 3 | 4 days                                            | Papule on leg, followed by general symptoms of fever and headache, and anal pain. | No known contact with a confirmed positive case.<br><br>One-week trip to Gran Canaria, Spain, with visits to several (sex) clubs (indirect) | None.                                                                          | 1                                            | Occasional (n=3) | Private sphere (Belgium)               | 1) Anal ("bottom")<br>2) Oro-penile (active and passive)<br>3) Kissing         | Penis, ano-rectum, oropharynx, lips.                        | No                                           | One occasional sex contact in private sphere on first night of onset of general symptoms. | No |
|   |                                                   |                                                                                   |                                                                                                                                             |                                                                                | 2                                            | Anonymous (n=2)  | Dancing club with dark room (Spain)    | 1) Anal ("bottom")<br>2) Oro-penile (active and passive)<br>3) Kissing         | Penis, ano-rectum, oropharynx, lips.                        | No                                           |                                                                                           |    |
| 4 | 5 days                                            | General symptoms and swollen cervical                                             | No contact with a confirmed positive case.                                                                                                  | None.                                                                          | 1                                            | Anonymous (n=1)  | Private sphere (Grindr date) (Belgium) | 1) Anal with condom ("top")<br>2) Oro-anal ("rimming")                         | Penis (where not covered by condom),                        | Yes                                          | None.                                                                                     | /  |

| # | Time between symptom onset and clinical diagnosis | Clinical manifestation                                                                                                     | Epidemiological link (direct/indirect) *                                                                 | Close physical contact (incl. household; no sex) -21 days before symptom onset | Sexual contact -21 days before symptom onset |                  |                                 |                                                                                 |                                               | Relevant contact since date of symptom onset |                                                |    |
|---|---------------------------------------------------|----------------------------------------------------------------------------------------------------------------------------|----------------------------------------------------------------------------------------------------------|--------------------------------------------------------------------------------|----------------------------------------------|------------------|---------------------------------|---------------------------------------------------------------------------------|-----------------------------------------------|----------------------------------------------|------------------------------------------------|----|
|   |                                                   |                                                                                                                            |                                                                                                          |                                                                                | Type of partner**                            | Setting          | Type of sex                     | Exposure site                                                                   | MPX suspect ***                               | Type of contact                              | MPX suspect ***                                |    |
|   |                                                   | lymph nodes followed by ulcers on penis and itchy vesicle on lip.                                                          | Sexual contact with a man that attended Darklands festival and noticed a rash on his buttocks.           |                                                                                |                                              |                  |                                 | oropharynx and lips.                                                            |                                               |                                              |                                                |    |
| 5 | 14 days                                           | General symptoms of fever and appetite loss followed by lymphadenopathy and skin lesion on forehead, back, legs and penis. | No known contact with a confirmed positive case.<br><br>Attended Darklands festival in Antwerp (Belgium) | None.                                                                          | 1                                            | Anonymous (n=1)  | Darklands Antwerp (Belgium)     | 1) Anal with condom ("top")<br>2) Oro-penile (active and passive)<br>3) Kissing | Penis, oropharynx, lips, cheeks, neck, torso. | No                                           | None.                                          | /  |
|   |                                                   |                                                                                                                            |                                                                                                          |                                                                                | 2                                            | Anonymous (n=1)  | Cruising club Antwerp (Belgium) | 1) Anal with condom ("top")<br>2) Oro-penile (active and passive)<br>3) Kissing | Penis, oropharynx, lips, cheeks, neck, torso. | No                                           |                                                |    |
| 6 | 15 days                                           | General symptoms followed by skin lesions on abdomen, arm, neck and perianal area and proctitis (concurrent Neissia        | No known contact with a confirmed positive case.<br><br>Sexual contact attended Darklands festival.      | None.                                                                          | 1                                            | Occasional (n=1) | Private sphere (Belgium)        | 1) Anal with condom ("top")<br>2) Oro-penile (passive)<br>3) Kissing            | Penis, oropharynx, lips.                      | No                                           | Slept in mother's bed without changing sheets. | No |
|   |                                                   |                                                                                                                            |                                                                                                          |                                                                                | 2                                            | Occasional (n=1) | Private sphere (Belgium)        | 1) Anal ("bottom and top")                                                      | Penis, ano-rectum, oropharynx, lips, cheeks,  | No                                           |                                                |    |

| # | Time between symptom onset and clinical diagnosis | Clinical manifestation                                                                                             | Epidemiological link (direct/indirect) *                                                                  | Close physical contact (incl. household; no sex) -21 days before symptom onset | Sexual contact -21 days before symptom onset |                 |                                                  |                                                                                |                                                              | Relevant contact since date of symptom onset |                                                   |    |
|---|---------------------------------------------------|--------------------------------------------------------------------------------------------------------------------|-----------------------------------------------------------------------------------------------------------|--------------------------------------------------------------------------------|----------------------------------------------|-----------------|--------------------------------------------------|--------------------------------------------------------------------------------|--------------------------------------------------------------|----------------------------------------------|---------------------------------------------------|----|
|   |                                                   |                                                                                                                    |                                                                                                           |                                                                                | Type of partner**                            | Setting         | Type of sex                                      | Exposure site                                                                  | MPX suspect ***                                              | Type of contact                              | MPX suspect ***                                   |    |
|   |                                                   | Gonorrhoea infection).                                                                                             |                                                                                                           |                                                                                |                                              |                 | 2) Oro-penile (active and passive)<br>3) Kissing | neck and torso.                                                                |                                                              |                                              |                                                   |    |
| 7 | 6 days                                            | Skin lesions on lower arm and lip, and general symptoms (fever, dry cough).                                        | No known contact with a confirmed positive case.<br><br>Attended Darklands festival in Antwerp (Belgium). | None.                                                                          | 1                                            | Stable (n=1)    | Private sphere (Belgium)                         | 1) Oro-penile (active and passive)<br>2) Kissing                               | Penis, oropharynx, lips.                                     | No                                           | None.                                             | /  |
|   |                                                   |                                                                                                                    |                                                                                                           |                                                                                | 2                                            | Anonymous (n=6) | Darklands Antwerp (Belgium)                      | 1) Anal ("bottom and top")<br>2) Oro-penile (active and passive)<br>3) Kissing | Penis, ano-rectum, oropharynx, lips, cheeks, neck and torso. | No                                           |                                                   |    |
|   |                                                   |                                                                                                                    |                                                                                                           |                                                                                | 3                                            | Anonymous (n=1) | Private sphere (Grindr date) in Paris (France)   | 1) Oro-penile (active and passive)<br>2) Kissing                               | Penis, oropharynx, lips.                                     | No                                           |                                                   |    |
| 8 | 4 days                                            | General symptoms followed by ulcerations on cheek, hands, finger, leg, and trunk. No anogenital lesions. Bacterial | No known contact with a confirmed positive case.                                                          | None.                                                                          | 1                                            | Stable (n=1)    | Private sphere (Belgium)                         | 1) Anal ("top")<br>2) Kissing                                                  | Penis, lips.                                                 | No                                           | Penetrative anal sex ("top") with stable partner. | No |
|   |                                                   |                                                                                                                    |                                                                                                           |                                                                                | 2                                            | Anonymous (n=2) | Cruising club (Belgium)                          | 1) Anal with condom ("top")<br>2) Oro-penile (passive)<br>3) Kissing           | Penis, lips.                                                 |                                              |                                                   |    |
|   |                                                   |                                                                                                                    |                                                                                                           |                                                                                | 3                                            | Anonymous (n=1) | Cruising club (Belgium)                          | 1) Anal ("top")<br>2) Oro-penile (passive)                                     | Penis, lips.                                                 | No                                           |                                                   |    |

| #  | Time between symptom onset and clinical diagnosis | Clinical manifestation                                | Epidemiological link (direct/indirect) *                                                                                                          | Close physical contact (incl. household; no sex) -21 days before symptom onset                                         | Sexual contact -21 days before symptom onset |                 |                                        |                                                                                            |                                                                             | Relevant contact since date of symptom onset |                                                |                                                                                                                         |
|----|---------------------------------------------------|-------------------------------------------------------|---------------------------------------------------------------------------------------------------------------------------------------------------|------------------------------------------------------------------------------------------------------------------------|----------------------------------------------|-----------------|----------------------------------------|--------------------------------------------------------------------------------------------|-----------------------------------------------------------------------------|----------------------------------------------|------------------------------------------------|-------------------------------------------------------------------------------------------------------------------------|
|    |                                                   |                                                       |                                                                                                                                                   |                                                                                                                        | Type of partner**                            | Setting         | Type of sex                            | Exposure site                                                                              | MPX suspect ***                                                             | Type of contact                              | MPX suspect ***                                |                                                                                                                         |
|    |                                                   | superinfection of face ulcer.                         |                                                                                                                                                   |                                                                                                                        |                                              |                 | 3) Kissing                             |                                                                                            |                                                                             |                                              |                                                |                                                                                                                         |
| 9  | 6 days                                            | General symptoms and skin lesions on penis and torso. | Roommate (see #10) tested MPX positive.<br><br>Had sexual contact with a man that attended Darklands festival and noticed a rash on his buttocks. | Frequent and long lasting skin-to-skin contact with roommate (sitting next to each other on couch); no sexual contact. | 1                                            | Anonymous (n=1) | Private sphere (Grindr date) (Belgium) | 1) Anal ("top")<br>2) Oro-penile (passive)<br>3) Kissing                                   | Penis, lips.                                                                | No                                           | Close physical contact with roommate (no sex). | Roommate developed symptoms of MPX 9 days after symptom onset of index case and later tested positive for MPX (see #10) |
|    |                                                   |                                                       |                                                                                                                                                   |                                                                                                                        | 2                                            | Anonymous (n=1) | Private sphere (Grindr date) (Belgium) | 1) Anal ("top")                                                                            | Penis.                                                                      | Yes                                          |                                                |                                                                                                                         |
| 10 | 5 days                                            | General symptoms and skin lesion on penis and pubis.  | Roommate (see #9) tested MPX positive                                                                                                             | See #9                                                                                                                 | 1                                            | Anonymous (n=3) | Cruising club (Belgium)                | 1) Anal with condom ("bottom and top")<br>2) Oro-penile (active and passive)<br>3) Kissing | Penis, oropharynx, ano-rectum (where no condom), lips, cheeks, neck, torso. | No                                           | Close physical contact with roommate (no sex). | Roommate developed symptoms of MPX earlier and recently tested positive for MPX (see #10)                               |
|    |                                                   |                                                       |                                                                                                                                                   |                                                                                                                        | 2                                            | Anonymous (n=7) | Cruising clubs in Budapest (Hungary)   | 1) Anal with condom ("bottom and top")                                                     | Penis, oropharynx, ano-rectum (where no condom), lips,                      | No                                           |                                                |                                                                                                                         |

| #  | Time between symptom onset and clinical diagnosis | Clinical manifestation                                                                                  | Epidemiological link (direct/indirect) * | Close physical contact (incl. household; no sex) -21 days before symptom onset                | Sexual contact -21 days before symptom onset |                 |                                                  |                                                                     |                                               | Relevant contact since date of symptom onset                                                                                                       |                                                                                                                      |                                                                                                                               |
|----|---------------------------------------------------|---------------------------------------------------------------------------------------------------------|------------------------------------------|-----------------------------------------------------------------------------------------------|----------------------------------------------|-----------------|--------------------------------------------------|---------------------------------------------------------------------|-----------------------------------------------|----------------------------------------------------------------------------------------------------------------------------------------------------|----------------------------------------------------------------------------------------------------------------------|-------------------------------------------------------------------------------------------------------------------------------|
|    |                                                   |                                                                                                         |                                          |                                                                                               | Type of partner**                            | Setting         | Type of sex                                      | Exposure site                                                       | MPX suspect ***                               | Type of contact                                                                                                                                    | MPX suspect ***                                                                                                      |                                                                                                                               |
|    |                                                   |                                                                                                         |                                          |                                                                                               |                                              |                 | 2) Oro-penile (active and passive)<br>3) Kissing | cheeks, neck, torso.                                                |                                               |                                                                                                                                                    |                                                                                                                      |                                                                                                                               |
| 11 | 10 days                                           | General symptoms, adenopathies and skin lesion on scrotum and lesion in the mouth.                      | None.                                    | Regular contact with stable partner as part of the same household.                            | 1                                            | Stable (n=1)    | Private sphere (Belgium)                         | 1) Anal ("top")<br>2) Oro-penile (active and passive)<br>3) Kissing | Penis, oropharynx, lips.                      | No                                                                                                                                                 | Sex date with stable partner and two occasional sex partners; sharing of "cock ring" with one of the men during sex. | One occasional partner developed symptoms of MPX 17 days after symptom onset of index case and later tested positive for MPX. |
|    |                                                   |                                                                                                         |                                          |                                                                                               | 2                                            | Anonymous (n=3) | Private sphere (Grindr date) (Belgium)           | 1) Anal ("top")<br>2) Oro-penile (active and passive)<br>3) Kissing | Penis, oropharynx, lips, cheeks, neck, torso. | No                                                                                                                                                 |                                                                                                                      |                                                                                                                               |
| 12 | 16 days                                           | Typical lesions on forehead, scalp, torso, pubic area, neck and eyebrows. No rash, no general symptoms. | None.                                    | Sharing of bath towels with friends staying over and attending several cruising (sex) clubs). | /                                            | /               | /                                                | /                                                                   | /                                             | 2-weekly visits at hairdresser and multiple (hasty) physical contacts as part of a social setting (e.g. hugging and kissing when greeting friends) | One contact with whom bath towels were shared tested positive for MPX                                                |                                                                                                                               |

| # | Time between symptom onset and clinical diagnosis | Clinical manifestation | Epidemiological link (direct/indirect) * | Close physical contact (incl. household; no sex) -21 days before symptom onset | Sexual contact -21 days before symptom onset |         |             |               |                 | Relevant contact since date of symptom onset |                             |
|---|---------------------------------------------------|------------------------|------------------------------------------|--------------------------------------------------------------------------------|----------------------------------------------|---------|-------------|---------------|-----------------|----------------------------------------------|-----------------------------|
|   |                                                   |                        |                                          |                                                                                | Type of partner**                            | Setting | Type of sex | Exposure site | MPX suspect *** | Type of contact                              | MPX suspect ***             |
|   |                                                   |                        |                                          |                                                                                |                                              |         |             |               |                 |                                              | (date of diagnosis unknown) |

\*A direct link refers to contact with a known confirmed MPX case; an indirect link refers to attendance of events publicly associated with the current MPX outbreak, or contact with sexual partners who disclosed having attended these events.

\*\* A distinction is made between self-reported “stable” (i.e. a spouse or fixed partner within a steady relationship), “occasional” (i.e. a casual partner without steady relationship but who is not unknown to the index case) and “anonymous” partners (i.e. person unknown to the index).

\*\*\*Refers to contacts being suspect of MPX based on either self-reported (i.e. through self-monitoring by the contact) or observed (e.g. by the index case) symptoms associated with an MPX infection.
