# Supplementary material
Source: PubMed Central journal article supplement (PMC10439260)
Supplement: sextrans-2022-055601supp003.pdf [file sextrans-2022-055601supp003.pdf]

**Dutch translation of abstract.****Doelstelling:**

De beschikbare epidemiologische en klinische gegevens van de huidige uitbraak van het Apenpokkenvirus in niet-endemische gebieden wijzen op een belangrijke factor van seksuele overdracht. Tot op heden is er echter weinig informatie beschikbaar over het gedrag en de ervaringen van personen die een Apenpokkenvirus-infectie doormaakten. We wilden de eerste fase van de uitbraak van Apenpokken in België beschrijven, inclusief een meer diepgaande beschrijving van seksueel gedrag en transmissiecontext.

**Methoden:**

We gebruikten routinematig verkregen nationale surveillance gegevens van 139 bevestigde gevallen van het Apenpokkenvirus met datum van aanvang van symptomen tot 19 juni 2022, aangevuld met 12 semi-gestructureerde interviews met een steekproef van deze gevallen.

**Resultaten:**

Geseksualiseerde omgevingen, waaronder grote festivals en “cruising”-locaties voor homoseksuele mannen, waren de vermoedelijke setting van blootstelling voor de meerderheid van de gevallen in de vroege uitbraakfase. Diepgaande interviews over seksueel gedrag ondersteunen de hypothese van Apenpokkenvirus overdracht door nauw lichamelijk contact tijdens seks. Ondanks het feit dat deelnemers op de hoogte waren van de huidige uitbraak van Apenpokken, werd een vroege diagnose van een Apenpokkenvirus-infectie vertraagd door een laag vermeend risico op verwerving van een Apenpokken infectie en het verwarren van de eerste tekenen en symptomen met andere seksueel overdraagbare infecties of huidaandoeningen. Bovendien beschrijven we relevante contextuele factoren buiten het individuele gedrag, die verband houden met seksuele netwerken, interpersoonlijke interacties en gezondheidssystemen. Sommige van deze factoren kunnen de vroege opsporing en bestrijding van Apenpokken bemoeilijken.

**Conclusie:**

Onze resultaten benadrukken de rol van seksueel contact en seksuele netwerken in de overdracht van het Apenpokkenvirus tijdens de vroege fase van de uitbraak in België. Risicocommunicatie moet consequent en transparant het dominante seksuele transmissiekaracter van het Apenpokkenvirus vermelden, en preventie- en controlemaatregelen moeten worden bijgestuurd om rekening te houden met factoren op verschillende niveaus, die bijdragen tot het risico op overdracht van het Apenpokkenvirus.
